# Supplementary material
Source: MDPI journal article supplement (https://www.mdpi.com/2311-7524/9/1/102)
Supplement: s1 [file s1]

## Supplementary Material

**Table S1.** The main climatic characteristics of the growing seasons in Novosibirsk and Vladivostok

| Parameter                 | Month |      |      |      |        |           |
|---------------------------|-------|------|------|------|--------|-----------|
|                           | April | May  | June | July | August | September |
| Novosibirsk               |       |      |      |      |        |           |
| Climate type: continental |       |      |      |      |        |           |
| Average maximum, °C       | 7.8   | 18.4 | 22.9 | 25.0 | 22.4   | 15.6      |
| Average temperature, °C   | 2.3   | 11.7 | 16.8 | 19.2 | 16.5   | 10.1      |
| Average minimum, °C       | -2.0  | 6.0  | 11.4 | 14.1 | 11.5   | 5.9       |
| Precipitation rate, mm    | 28    | 34   | 50   | 72   | 49     | 42        |
| Vladivostok               |       |      |      |      |        |           |
| Climate type: monsoon     |       |      |      |      |        |           |
| Average maximum, °C       | 9.4   | 14.7 | 18.1 | 21.9 | 24.1   | 20.2      |
| Average temperature, °C   | 4.9   | 9.8  | 14.0 | 18.3 | 20.8   | 16.4      |
| Average minimum, °C       | 1.9   | 6.7  | 11.4 | 16.2 | 18.5   | 13.5      |
| Precipitation rate, mm    | 62    | 95   | 89   | 164  | 145    | 92        |

**Table S2.** Main climatic characteristics of the 2012 growing season (Novosibirsk)

| Month     | Air temperature, °C |                         | Precipitation, mm |           |
|-----------|---------------------|-------------------------|-------------------|-----------|
|           | Average monthly     | Deviation from the norm | Amount per month  | % of norm |
| April     | 6.4                 | 4.1                     | 5                 | 21        |
| May       | 11.3                | 0.4                     | 13                | 35        |
| June      | 21.8                | 4.9                     | 19                | 35        |
| July      | 22.5                | 3.1                     | 4                 | 7         |
| August    | 17.1                | 0.9                     | 67                | 100       |
| September | 12.5                | 2.5                     | 41                | 95        |

**Table S3.** Main climatic characteristics of the 2013 growing season (Novosibirsk)

| Month     | Air temperature, °C |                         | Precipitation, mm |           |
|-----------|---------------------|-------------------------|-------------------|-----------|
|           | Average monthly     | Deviation from the norm | Amount per month  | % of norm |
| April     | 3.5                 | 1.2                     | 22                | 92        |
| May       | 8.7                 | -2.2                    | 76                | 205       |
| June      | 14.8                | -2.1                    | 38                | 69        |
| July      | 19.2                | -0.2                    | 75                | 123       |
| August    | 17.6                | 1.4                     | 165               | 246       |
| September | 9.4                 | -0.6                    | 52                | 121       |
